# Supplementary material for: Hydration structure of osmolyte TMAO: concentration/pressure-induced response
Source: Royal Society of Chemistry journal article supplement (doi:10.1039/c6nj03296f), 2017-01-01
Supplement: c6nj03296f1.pdf [file c6nj03296f1.pdf]

## **Hydration Structure of Osmolyte TMAO: Concentration- / Pressure-induced Response**

Marina V. Fedotova\*<sup>1</sup>, Sergey E. Kruchinin<sup>1</sup> and Gennady N. Chuev<sup>2</sup>

<sup>1</sup>*G.A. Krestov Institute of Solution Chemistry, the Russian Academy of Sciences,  
Akademicheskaya st., 1, Ivanovo, 153045 Russia*

<sup>2</sup>*Institute of Theoretical and Experimental Biophysics, the Russian Academy of Sciences,  
Institutskaya st., Pushchino, Moscow Region, 142290 Russia*

\*Email address: [hebrus@mail.ru](mailto:hebrus@mail.ru) (M. V. Fedotova)

### **Electronic Supplementary Information**

## The optimized structure of TMAO

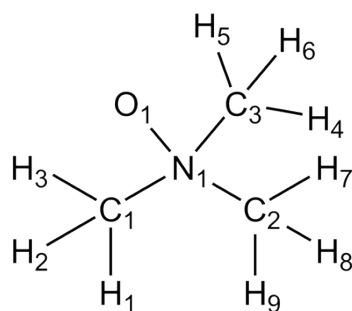

Figure S-1. Schematic representation with atom labeling for TMAO

Table S-1. Atom coordinates of TMAO with atom labeling according to Fig. S-1.

| Atom | $x, \text{Å}$ | $y, \text{Å}$ | $z, \text{Å}$ |
|------|---------------|---------------|---------------|
| N1   | -0.401        | 0.207         | 0.566         |
| O1   | -0.254        | 1.509         | 0.948         |
| C1   | -1.243        | -0.504        | 1.568         |
| C2   | 0.942         | -0.433        | 0.489         |
| C3   | -1.059        | 0.162         | -0.770        |
| H1   | -0.732        | -0.402        | 2.519         |
| H2   | -2.185        | 0.031         | 1.605         |
| H3   | -1.387        | -1.551        | 1.301         |
| H4   | -1.197        | -0.862        | -1.115        |
| H5   | -2.008        | 0.675         | -0.657        |
| H6   | -0.421        | 0.726         | -1.441        |
| H7   | 1.382         | -0.334        | 1.474         |
| H8   | 0.871         | -1.478        | 0.185         |
| H9   | 1.515         | 0.150         | -0.224        |
